# Supplementary material for: Postpartum depression and autoimmune disease: a bidirectional Mendelian randomization study
Source: Front Psychiatry. 2024 Aug 29;15:1425623. doi: 10.3389/fpsyt.2024.1425623 (PMC11390621; doi:10.3389/fpsyt.2024.1425623)
Supplement: Supplementary file 2 [file Table1.xlsx]

## Sheet: S1
Supplemental Table 1. Overview of the source of Autoimmune Disease data.
GWAS ID	Year	Trait	Consortium/PMID	Sample size	Case	Control	Number of SNPs	Population
ebi-a-GCST90014023	2021	Type 1 diabetes	34012112	520580	18942	501638	59999551	European
ebi-a-GCST90018847	2021	Graves' disease	34594039	139274	1678	456942	24189816	European
ebi-a-GCST90018855	2021	Hashimoto thyroiditis	34594039	395640	46785	379986	24146037	European
ebi-a-GCST90018910	2021	Rheumatoid arthritis	34594039	417256	8255	409001	24175266	European
finn-b-M13_ANKYLOSPON	2021	Ankylosing spondylitis	FINGEN	NA	1462	164682	16380022	European
finn-b-GIANT_CELL_TEMP_ARTERITIS	2021	Giant cell arteritis with polymyalgia rheumatica	FINGEN	NA	421	217965	16380462	European
finn-b-M13_POLYARTERETAL	2021	Polyarteritis nodosa and related conditions	FINGEN	NA	164	213145	16380450	European
finn-b-D3_ALLERGPURPURA	2021	Allergic purpura	FINGEN	NA	470	216099	16380461	European
ebi-a-GCST90018578	2021	Behcet's disease	34594039	172044	78	171966	12453729	European
ebi-a-GCST90018917	2021	Systemic lupus erythematosus	34594039	482911	647	482264	24198877	European
ebi-a-GCST90018907	2021	Psoriasis vulgaris	34594039	483174	5072	478102	24191364	European
finn-b-L12_VITILIGO	2021	Vitiligo	FINGEN	NA	131	207482	16380442	European
finn-b-L12_ALOPECAREATA	2021	Alopecia areata	FINGEN	NA	289	211139	16380450	European
ebi-a-GCST90018865	2021	Idiopathic thrombocytopenic purpura	34594039	489424	675	488749	24199770	European
ieu-b-18	2019	multiple sclerosis	International Multiple Sclerosis Genetics Consortium	115803	47429	68374	6304359	European
ebi-a-GCST90093061	2022	Myasthenia gravis	35074870	38243	1873	36370	23679120	European
finn-b-ENCEPHALITIS	2021	Encephalitis	FINGEN	NA	398	217308	16380465	European
finn-b-G6_GUILBAR	2021	Guillain-Barre syndrome	FINGEN	NA	213	215718	16380463	European
finn-b-K11_ULCER	2021	Ulcerative colitis	FINGEN	NA	4320	210300	16380459	European
ebi-a-GCST004132	2017	Crohn's disease	28067908	40266	12194	28072	9457998	European
finn-b-K11_COELIAC	2021	Coeliac disease	FINGEN	NA	1973	210964	16380438	European
ebi-a-GCST90018866	2021	IgA nephropathy	34594039	477784	15587	462197	24182646	European
ebi-a-GCST90018918	2021	Sarcoidosis	34594039	486673	1718	484955	24196796	European
