# Supplementary material for: Postpartum depression and autoimmune disease: a bidirectional Mendelian randomization study
Source: Front Psychiatry. 2024 Aug 29;15:1425623. doi: 10.3389/fpsyt.2024.1425623 (PMC11390621; doi:10.3389/fpsyt.2024.1425623)
Supplement: Supplementary file 3 [file Table2.xlsx]

## Sheet: Sheet1
Postpartum depression for Autoimmune diseases (Inverse variance weighted)
id.exposure	id.outcome	outcome	exposure	nsnp	b	se	pval	lo_ci	up_ci	or	or_lci95	or_uci95
the Finngen R8	ebi-a-GCST90014023	Type 1 diabetes	Postpartum depression	23	0.138953	0.0472523	0.00327504	0.0463389	0.231568	1.14907	1.04743	1.26057
the Finngen R8	ebi-a-GCST90018847	Graves' disease	Postpartum depression	23	0.0921497	0.068001	0.175379	-0.0411323	0.225432	1.09653	0.959702	1.25286
the Finngen R8	ebi-a-GCST90018855	Hashimoto thyroiditis	Postpartum depression	23	0.189446	0.0519296	0.000264156	0.0876639	0.291228	1.20858	1.09162	1.33807
the Finngen R8	ebi-a-GCST90018910	Rheumatoid arthritis	Postpartum depression	23	-0.0126125	0.0384259	0.742738	-0.0879272	0.0627022	0.987467	0.915828	1.06471
the Finngen R8	finn-b-M13_ANKYLOSPON	Ankylosing spondylitis	Postpartum depression	23	0.00160221	0.129934	0.990162	-0.253068	0.256272	1.0016	0.776415	1.2921
the Finngen R8	finn-b-GIANT_CELL_TEMP_ARTERITIS	Giant cell arteritis with polymyalgia rheumatica	Postpartum depression	23	0.025452	0.223607	0.909377	-0.412819	0.463723	1.02578	0.661782	1.58998
the Finngen R8	finn-b-M13_POLYARTERETAL	Polyarteritis nodosa and related conditions	Postpartum depression	23	0.11977	0.398981	0.764033	-0.662234	0.901773	1.12724	0.515698	2.46397
the Finngen R8	finn-b-D3_ALLERGPURPURA	Allergic purpura	Postpartum depression	23	-0.124713	0.210104	0.552794	-0.536517	0.287091	0.88275	0.584781	1.33254
the Finngen R8	ebi-a-GCST90018578	Behcet's disease	Postpartum depression	18	0.744537	0.468853	0.112287	-0.174415	1.66349	2.10547	0.839948	5.2777
the Finngen R8	ebi-a-GCST90018917	Systemic lupus erythematosus	Postpartum depression	23	0.240256	0.156071	0.123705	-0.0656424	0.546155	1.27158	0.936466	1.7266
the Finngen R8	ebi-a-GCST90018907	Psoriasis vulgaris	Postpartum depression	23	-0.0367771	0.0767335	0.631737	-0.187175	0.113621	0.963891	0.829299	1.12033
the Finngen R8	finn-b-L12_VITILIGO	Vitiligo	Postpartum depression	23	0.812332	0.420452	0.0533541	-0.0117543	1.63642	2.25316	0.988315	5.13674
the Finngen R8	finn-b-L12_ALOPECAREATA	Alopecia areata	Postpartum depression	23	0.00346314	0.264209	0.989542	-0.514387	0.521314	1.00347	0.597867	1.68424
the Finngen R8	ebi-a-GCST90018865	Idiopathic thrombocytopenic purpura	Postpartum depression	23	0.139279	0.149516	0.351576	-0.153771	0.43233	1.14944	0.857468	1.54084
the Finngen R8	ieu-b-18	multiple sclerosis	Postpartum depression	18	0.024595	0.0646382	0.703572	-0.102096	0.151286	1.0249	0.902943	1.16333
the Finngen R8	ebi-a-GCST90093061	Myasthenia gravis	Postpartum depression	20	-0.108532	0.122169	0.37434	-0.347984	0.13092	0.89715	0.70611	1.13988
the Finngen R8	finn-b-ENCEPHALITIS	Encephalitis	Postpartum depression	23	0.507657	0.229059	0.0266725	0.0587027	0.956612	1.66139	1.06046	2.60286
the Finngen R8	finn-b-G6_GUILBAR	Guillain-Barre syndrome	Postpartum depression	23	0.0252497	0.336748	0.94023	-0.634777	0.685276	1.02557	0.530054	1.98432
the Finngen R8	ebi-a-GCST90018933	Ulcerative colitis	Postpartum depression	23	-0.0232864	0.0594683	0.695372	-0.139844	0.0932716	0.976983	0.869494	1.09776
the Finngen R8	ebi-a-GCST004132	Crohn's disease	Postpartum depression	22	-0.0270541	0.0588277	0.645597	-0.142356	0.0882481	0.973309	0.867312	1.09226
the Finngen R8	finn-b-K11_COELIAC	Coeliac disease	Postpartum depression	23	-0.0987104	0.109358	0.36672	-0.313052	0.115631	0.906005	0.731212	1.12258
the Finngen R8	ebi-a-GCST90018866	IgA nephropathy	Postpartum depression	23	0.0599991	0.0421375	0.154479	-0.0225904	0.142589	1.06184	0.977663	1.15326
the Finngen R8	ebi-a-GCST90018918	Sarcoidosis	Postpartum depression	23	-0.0652978	0.111269	0.557305	-0.283384	0.152789	0.936788	0.75323	1.16508
Autoimmune diseases for Postpartum depression
id.exposure	id.outcome	outcome	exposure	nsnp	b	se	pval	lo_ci	up_ci	or	or_lci95	or_uci95
ebi-a-GCST90014023	the Finngen R8	Postpartum depression	Type 1 diabetes	134	-0.00407435	0.00928069	0.660652	-0.0222645	0.0141158	0.995934	0.977982	1.01422
ebi-a-GCST90018847	the Finngen R8	Postpartum depression	Graves' disease	45	-0.00671383	0.0133763	0.615725	-0.0329315	0.0195038	0.993309	0.967605	1.0197
ebi-a-GCST90018855	the Finngen R8	Postpartum depression	Hashimoto thyroiditis	38	0.0239704	0.0198809	0.227934	-0.0149962	0.062937	1.02426	0.985116	1.06496
ebi-a-GCST90018910	the Finngen R8	Postpartum depression	Rheumatoid arthritis	19	-0.0219141	0.0195453	0.262205	-0.0602229	0.0163947	0.978324	0.941555	1.01653
finn-b-M13_ANKYLOSPON	the Finngen R8	Postpartum depression	Ankylosing spondylitis	8	0.0214906	0.0125288	0.0862907	-0.00306582	0.046047	1.02172	0.996939	1.04712
finn-b-GIANT_CELL_TEMP_ARTERITIS	the Finngen R8	Postpartum depression	Giant cell arteritis with polymyalgia rheumatica	9	0.00434003	0.0107357	0.68602	-0.0167019	0.025382	1.00435	0.983437	1.02571
finn-b-M13_POLYARTERETAL	the Finngen R8	Postpartum depression	Polyarteritis nodosa and related conditions	8	-0.00579487	0.00944172	0.539379	-0.0243006	0.0127109	0.994222	0.975992	1.01279
finn-b-D3_ALLERGPURPURA	the Finngen R8	Postpartum depression	Allergic purpura	12	-0.0158647	0.0129102	0.21913	-0.0411687	0.00943937	0.984261	0.959667	1.00948
ebi-a-GCST90018798	the Finngen R8	Postpartum depression	Behcet's disease	6	0.00553058	0.00516675	0.284432	-0.00459626	0.0156574	1.00555	0.995414	1.01578
ebi-a-GCST90018917	the Finngen R8	Postpartum depression	Systemic lupus erythematosus	11	0.00389914	0.0139177	0.779357	-0.0233795	0.0311778	1.00391	0.976892	1.03167
ebi-a-GCST90018907	the Finngen R8	Postpartum depression	Psoriasis vulgaris	34	0.0175095	0.0135815	0.197323	-0.00911028	0.0441293	1.01766	0.990931	1.04512
finn-b-L12_VITILIGO	the Finngen R8	Postpartum depression	Vitiligo	3	-0.00596454	0.0127396	0.63965	-0.0309342	0.0190051	0.994053	0.969539	1.01919
finn-b-L12_ALOPECAREATA	the Finngen R8	Postpartum depression	Alopecia areata	11	0.00676673	0.00910285	0.457262	-0.0110749	0.0246083	1.00679	0.988986	1.02491
ebi-a-GCST90018865	the Finngen R8	Postpartum depression	Idiopathic thrombocytopenic purpura	9	0.00854735	0.0188492	0.650218	-0.0283971	0.0454918	1.00858	0.972002	1.04654
ieu-b-18	the Finngen R8	Postpartum depression	multiple sclerosis	116	-0.0107145	0.0110267	0.331206	-0.0323269	0.0108979	0.989343	0.96819	1.01096
ebi-a-GCST90093061	the Finngen R8	Postpartum depression	Myasthenia gravis	26	0.00414688	0.0130135	0.749984	-0.0213595	0.0296533	1.00416	0.978867	1.0301
finn-b-ENCEPHALITIS	the Finngen R8	Postpartum depression	Encephalitis	5	-0.0192411	0.0161729	0.234159	-0.0509399	0.0124577	0.980943	0.950336	1.01254
finn-b-G6_GUILBAR	the Finngen R8	Postpartum depression	Guillain-Barre syndrome	4	0.00472161	0.0124727	0.705019	-0.019725	0.0291682	1.00473	0.980468	1.0296
ebi-a-GCST90018933	the Finngen R8	Postpartum depression	Ulcerative colitis	46	0.00240559	0.0184335	0.89617	-0.0337241	0.0385353	1.00241	0.966838	1.03929
ebi-a-GCST004132	the Finngen R8	Postpartum depression	Crohn's disease	159	0.00580007	0.0106244	0.585123	-0.0150238	0.026624	1.00582	0.985088	1.02698
finn-b-K11_COELIAC	the Finngen R8	Postpartum depression	Coeliac disease	17	-0.00316215	0.00916335	0.730029	-0.0211223	0.014798	0.996843	0.979099	1.01491
ebi-a-GCST90018866	the Finngen R8	Postpartum depression	IgA nephropathy	20	-0.0206118	0.0465553	0.657955	-0.11186	0.0706366	0.979599	0.894169	1.07319
ebi-a-GCST90018918	the Finngen R8	Postpartum depression	Sarcoidosis	23	0.0127513	0.0164152	0.437278	-0.0194225	0.044925	1.01283	0.980765	1.04595
